# Supplementary material for: Kaempferol modulates TCDD- and t-BHQ-induced drug-metabolizing enzymes and luteolin enhances this effect
Source: Royal Society of Chemistry journal article supplement (doi:10.1039/c9fo02951f), 2020-01-01
Supplement: c9fo02951f2.pdf [file c9fo02951f2.pdf]

1 Supplemental Fig. 1

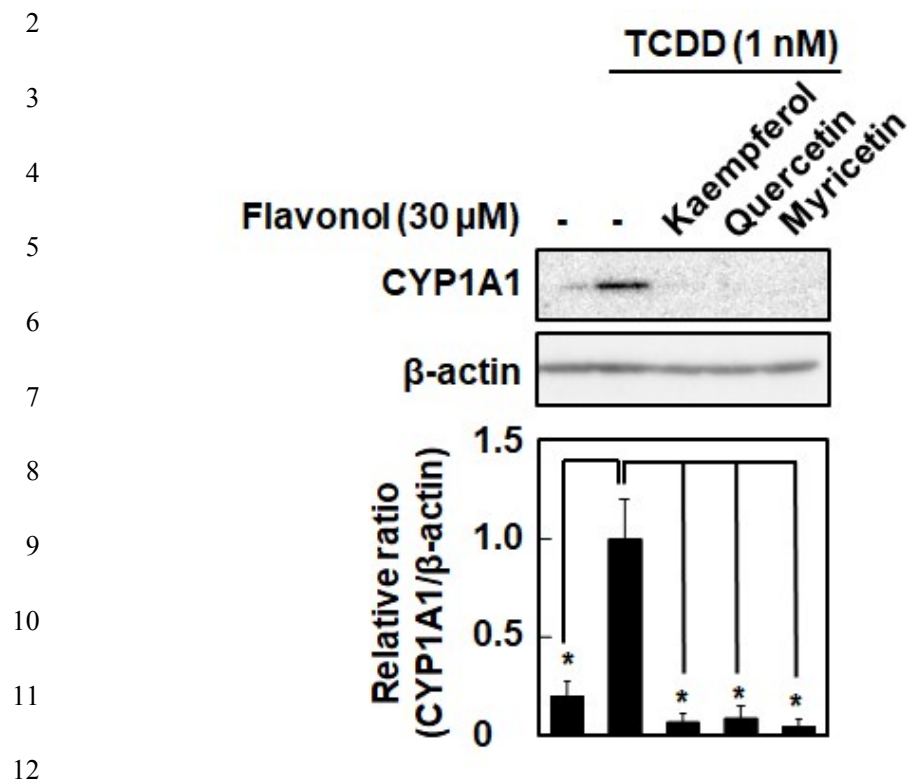

13 Supplemental figure 1. Effect of flavonols on the TCDD-induced expression of  
14 CYP1A1 in HepG2 cells. HepG2 cells were treated with 30  $\mu$ M kaempferol, quercetin  
15 and myricetin for 10 min. The cells were then exposed to 1 nM TCDD or DMSO alone  
16 as a vehicle control for another 24 h in the presence of kaempferol, quercetin and  
17 myricetin. Cell lysates were prepared and used for measurement of the protein expression  
18 of CYP1A1 and  $\beta$ -actin by Western blotting analysis using the respective antibodies.  
19 Typical representative data are shown from three independent experiments. The  
20 densitometric analysis of specific bands is also shown after normalization by  $\beta$ -actin  
21 expression, and the value for TCDD alone was set to 1. The results represent the mean  $\pm$   
22 SD (n = 3). Asterisks indicate a significant difference compared with the value for TCDD  
23 alone by Dunnett's test ( $p < 0.05$ ).
